# Supplementary material
Source: MDPI journal article supplement (https://www.mdpi.com/2227-9040/9/4/68)
Supplement: s1 [file s1]

## **Supporting Information For:**

### **A Deferasirox Derivative that Acts as a Multifaceted Platform for the Detection and Quantification of Fe<sup>3+</sup>**

Axel Steinbrueck, Adam C. Sedgwick, Suh Mi Hwang, Sajal Sen, Michael Y. Zhao, Dan Ying Huang, Daniel M. Knoll, Yu-Ying Wang, and Jonathan L. Sessler\*

Department of Chemistry, The University of Texas at Austin, 105 E 24th street A5300, Austin, TX 78712-1224 (USA)

**Emails:**

sessler@cm.utexas.edu

|                                                                                              |            |
|----------------------------------------------------------------------------------------------|------------|
| <b>1. SYNTHESIS .....</b>                                                                    | <b>S4</b>  |
| 1.1. OXAZINONE INTERMEDIATE .....                                                            | S5         |
| 1.2. DEFERASIROX <b>1</b> .....                                                              | S6         |
| 1.3. EXSO <sub>3</sub> H <b>2</b> .....                                                      | S7         |
| <b>2. <sup>1</sup>H NMR, <sup>13</sup>C NMR AND HRMS SPECTRA; LIQUID CHROMATOGRAMS .....</b> | <b>S8</b>  |
| <b>3. UV-VIS AND FLUORESCENCE SPECTROSCOPIC EXPERIMENTS .....</b>                            | <b>S14</b> |
| <b>4. REFERENCE .....</b>                                                                    | <b>S15</b> |

**Common abbreviations used:**

a.u. = arbitrary units (intensity scale in fluorescence spectra)

Ac = acetyl

A549 = human lung cancer cell line

DCM = dichloromethane

Et = ethyl

FBS = fetal bovine serum (additive in cell growth media for MTT assays)

HSA = human serum album

Me = methyl

P/S = penicillin/streptomycin

r.t. = room temperature

TEA = triethylamine

## 1. Synthesis

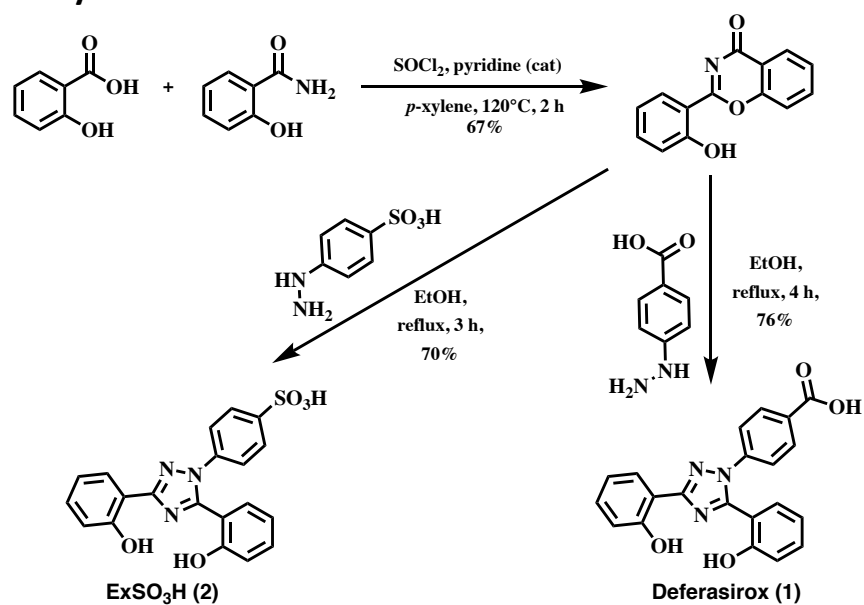

**Scheme S1** – Synthetic scheme for deferasirox (**1**) and its sulfonated derivative **2**.

### 1.1. Oxazinone Intermediate

#### 2-(2-Hydroxyphenyl)-4H-benzo[e][1,3]oxazin-4-one

This synthesis was adapted from the literature.<sup>1</sup>

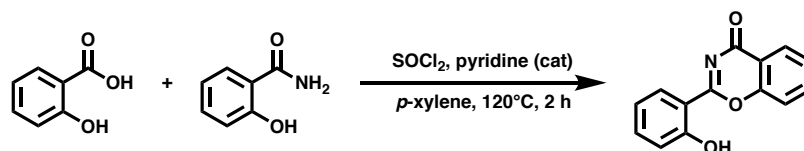

In a 250 ml round bottom flask equipped with a reflux condenser, salicylic acid (11.1 g, 80.2 mmol, 1.1 eq), salicylamide (10.0 g, 72.9 mmol, 1.0 eq) and pyridine (0.5 ml, catalyst) were dissolved in *o*-xylene (50 ml). The resulting solution was heated to 80°C. SOCl<sub>2</sub> (5.0 ml, 69.3 mmol 0.9 eq) was added dropwise over the course of 5 min. The reaction mixture was heated further to 120°C, stirred for 1 h, and then another aliquot of SOCl<sub>2</sub> (5.0 ml, 69.3 mmol 0.9 eq) was added dropwise over the course of 5 min. The reaction mixture was stirred for another 1 h at 120°C. After cooling, the volatiles were removed under reduced pressure and to the residue was added ethanol (50 mL) and acetic acid (1 mL). The resulting suspension was cooled to 4°C in the fridge for 10 min and the precipitate was filtered off, washed with cold ethanol (three times, 50 mL each) and dried under vacuum to yield the product as yellow-green powder (17.9 g, 93%).

<sup>1</sup>H-NMR (400 MHz, CDCl<sub>3</sub>):

δ 12.73 (s, 1 H, O-H), 8.22 (dd, *J* = 1.7, 8.2 Hz, 1 H, ArH), 8.12 (ddd, *J* = 0.4, 1.7, 8.1 Hz, 1 H, ArH), 7.81 (ddd, *J* = 1.7, 7.4, 8.4 Hz, 1 H, ArH), 7.51-7.57 (m, 3 H, ArH), 7.10 (ddd, *J* = 0.4, 1.2, 8.5 Hz, 1 H, ArH), 7.01 (ddd, *J* = 1.2, 7.1, 8.2 Hz, 1 H, ArH)

<sup>13</sup>C-NMR (100.6 MHz, CDCl<sub>3</sub>):

δ 165.3, 164.0, 163.2, 154.2, 136.9, 135.8, 128.7, 128.1, 127.3, 119.5, 118.9, 118.4, 117.0, 111.3

HR-MS (ESI): C<sub>14</sub>H<sub>9</sub>NO<sub>3</sub>

Calculated ([M+H]<sup>+</sup>): 240.0661

Found: 240.0658

### 1.2. Deferasirox 1

#### 4-(3,5-Bis(2-hydroxyphenyl)-1H-1,2,4-triazol-1-yl)benzoic acid

This synthesis was adapted from the literature.<sup>1</sup>

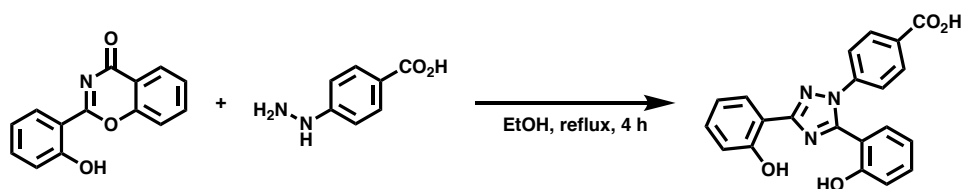

In a 250 mL round bottom flask, 4-hydrazinobenzoic acid (10.5 g, 43.9 mmol) was heated at reflux in ethanol (100 mL) for 10 min. Then, 2-(2-hydroxyphenyl)-4H-benzo[e][1,3]oxazin-4-one (7.40 g, 48.7 mmol, 1.1 eq.) was added all at once through a solid addition funnel and the reaction was stirred at reflux for 4 h. After cooling to room temperature, the reaction mixture was filtered off and the filter cake was washed once with cold ethanol (50 mL) and then twice with cold methanol (50 mL each). After drying under vacuum, the product was obtained as a pale brown powder (12.5 g, 33.5 mmol, 76%).

For biological studies, a portion of the product (5.0 g, 13 mmol) was recrystallized from ethanol (400 mL) to produce a white fluffy powder (2.9 g, 10 mmol, 58%).

<sup>1</sup>H-NMR (500 MHz, DMSO-*d*<sub>6</sub>):

δ 13.09 (s, 1 H, COO-*H*), 10.81 (s, 1 H, O-*H*), 10.06 (s, 1 H, O-*H*), 8.06 (dd, *J* = 1.7, 7.8 Hz, 1 H, *ArH*), 7.98-8.01 (m, 2 H, *ArH*), 7.53 - 7.58 (m, 3 H, *ArH*), 7.35 - 7.42 (m, 2 H, *ArH*), 6.96 - 7.05 (m, 3 H, *ArH*), 6.87 (dd, *J* = 1.0, 8.3 Hz, 1 H, *ArH*)

<sup>13</sup>C-NMR (125.75 MHz, DMSO-*d*<sub>6</sub>):

δ 166.9, 160.4, 156.8, 155.6, 152.5, 141.7, 133.0, 131.9, 131.5, 131.0, 130.8, 127.2, 123.8, 120.2, 119.9, 117.5, 116.6, 114.9, 114.1

HR-MS (ESI): C<sub>21</sub>H<sub>15</sub>N<sub>3</sub>O<sub>4</sub>

Calculated ([M+H]<sup>+</sup>): 374.1141

Found: 374.1143

### 1.3. $\text{ExSO}_3\text{H}$ 2

#### 4-(3,5-Bis(2-hydroxyphenyl)-1H-1,2,4-triazol-1-yl)benzenesulfonic acid

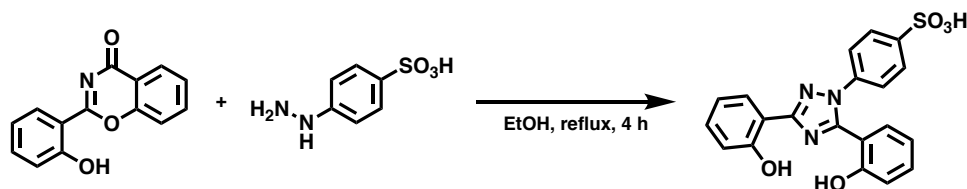

In a 250 mL round bottom flask, 4-hydrazinbenzenesulfonic acid (8.7 g, 46.0 mmol, 1.1 eq.) was heated at reflux in ethanol (100 mL) for 2 min. Then, 2-(2-hydroxyphenyl)-4H-benzo[e][1,3]oxazin-4-one (10.0 g, 41.8 mmol, 1.0 eq.) was added at once through a solid addition funnel and the reaction was stirred at reflux for 3 h. The reaction was cooled to room temperature and the volatiles were removed from the reaction mixture on a rotary evaporator (60 mbar, 50°C water bath). To the brown residue was added methanol (100 mL), and the resulting solid mass collected on a glass filter frit. The filter cake, containing the product, was washed with cold methanol (4°C, 4 times with 50 mL MeOH each) and acetone (4°C, 1 time with 50 mL) followed by drying under vacuum to yield the product (13.4 g, 70%) as white, bulky powder.

$^1\text{H}$ -NMR (500 MHz,  $\text{DMSO}-d_6$ ):

8.04 (dd,  $J = 1.8, 7.8$  Hz, 1 H, ArH), 7.65 (d,  $J = 8.6$  Hz, 2 H, ArH), 7.51 (dd,  $J = 1.7, 7.6$  Hz, 1 H, ArH), 7.35-7.43 (m, 4 H, ArH), 6.94 - 7.05 (m, 3 H, ArH), 6.87 (dd,  $J = 1.0, 8.3$  Hz, 1 H, ArH)

$^{13}\text{C}$ -NMR (125.75 MHz,  $\text{DMSO}-d_6$ ):

$\delta$  159.2, 156.3, 155.3, 151.7, 148.3, 137.6, 132.5, 131.5, 131.1, 126.9, 126.5, 123.1, 119.7, 119.4, 117.0, 116.2, 114.2, 113.6

HR-MS (ESI):  $\text{C}_{20}\text{H}_{15}\text{N}_3\text{O}_5\text{S}$

Calculated ( $[\text{M}+\text{H}]^+$ ): 410.0811

Found: 410.0806

## 2. $^1\text{H}$ NMR, $^{13}\text{C}$ NMR and HRMS spectra; liquid chromatograms

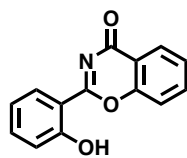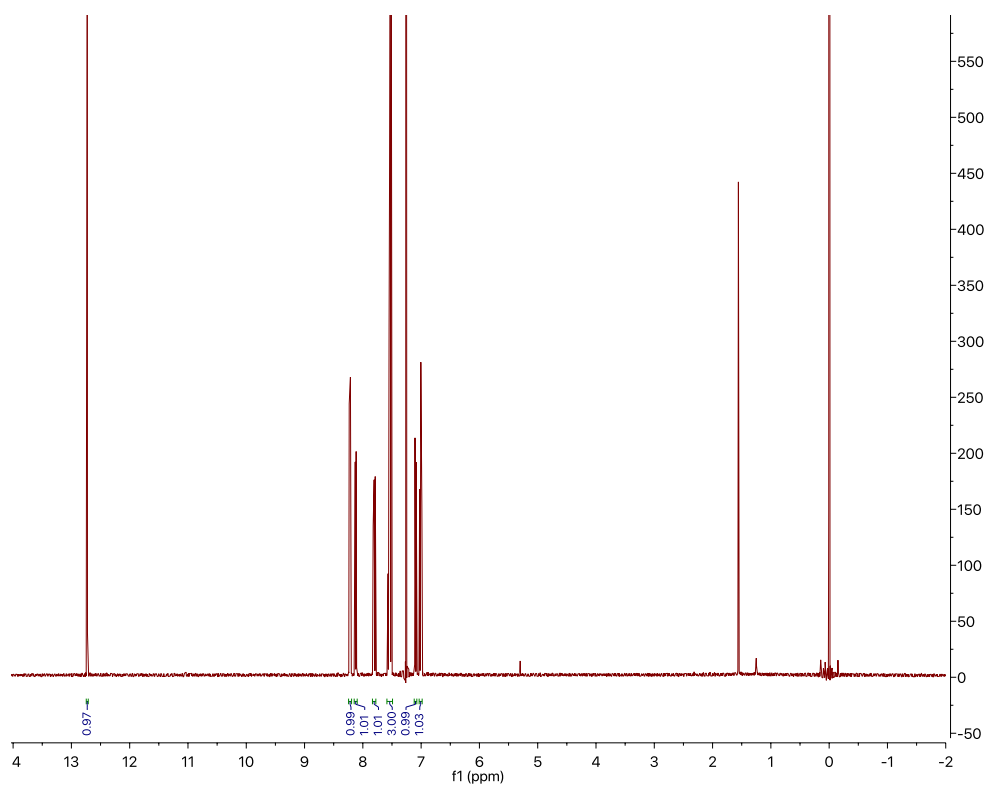

$^1\text{H}$  NMR spectrum of 2-(2-hydroxyphenyl)-4H-benzo[e][1,3]oxazin-4-one (400 MHz,  $\text{CDCl}_3$ )

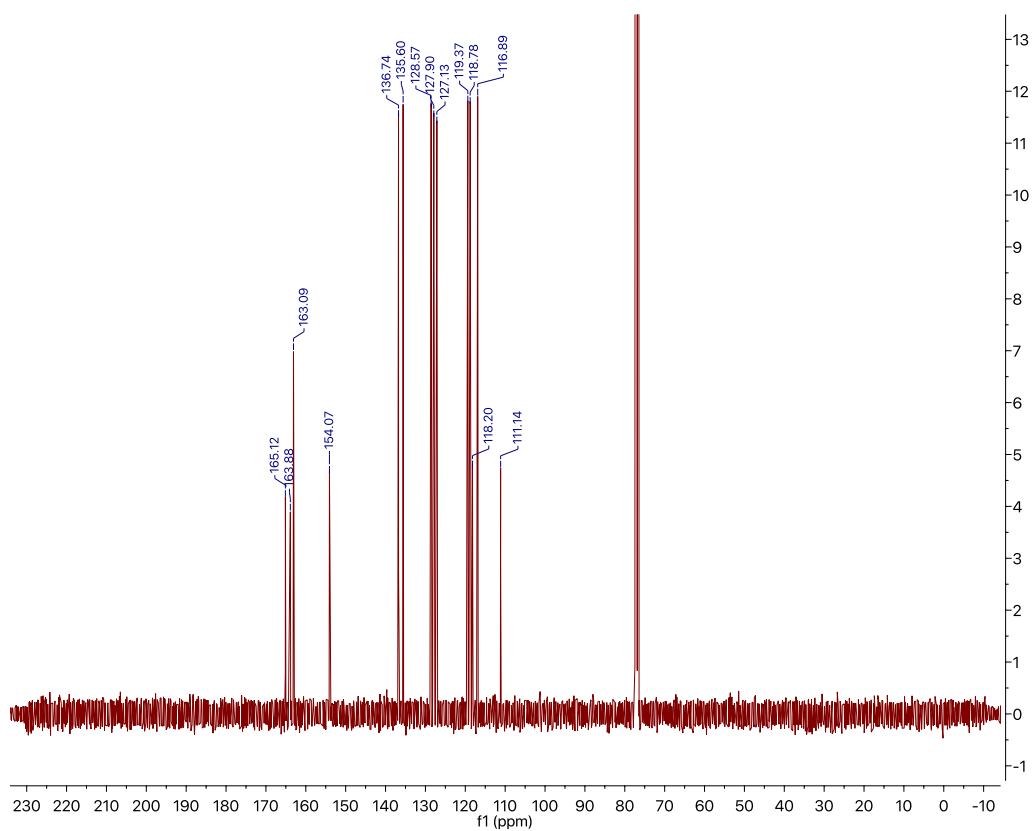

$^{13}\text{C}$  NMR spectrum of 2-(2-hydroxyphenyl)-4H-benzo[e][1,3]oxazin-4-one (100.6 MHz,  $\text{CDCl}_3$ )

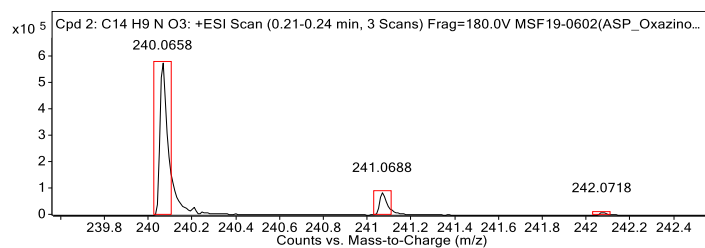

MS Spectrum Peak List

| Obs. m/z | Calc. m/z | Charge | Abundance | Formula                              | Ion Species             | Tgt Mass Error (ppm) |
|----------|-----------|--------|-----------|--------------------------------------|-------------------------|----------------------|
| 240.0658 | 240.0655  | 1      | 581677    | $\text{C}_{14}\text{H}_9\text{NO}_3$ | $(\text{M}+\text{H})^+$ | -1.24                |
| 241.0688 | 241.0688  | 1      | 88067     | $\text{C}_{14}\text{H}_9\text{NO}_3$ | $(\text{M}+\text{H})^+$ | -0.37                |
| 242.0718 | 242.0712  | 1      | 11116     | $\text{C}_{14}\text{H}_9\text{NO}_3$ | $(\text{M}+\text{H})^+$ | -2.31                |
| 243.0168 | 243.0738  | 1      | 502       | $\text{C}_{14}\text{H}_9\text{NO}_3$ | $(\text{M}+\text{H})^+$ | 234.28               |

--- End Of Report ---

HRMS (ESI) analysis of 2-(2-hydroxyphenyl)-4H-benzo[e][1,3]oxazin-4-one

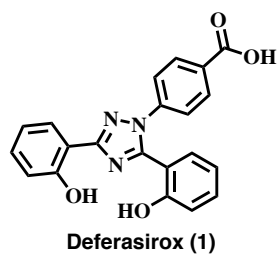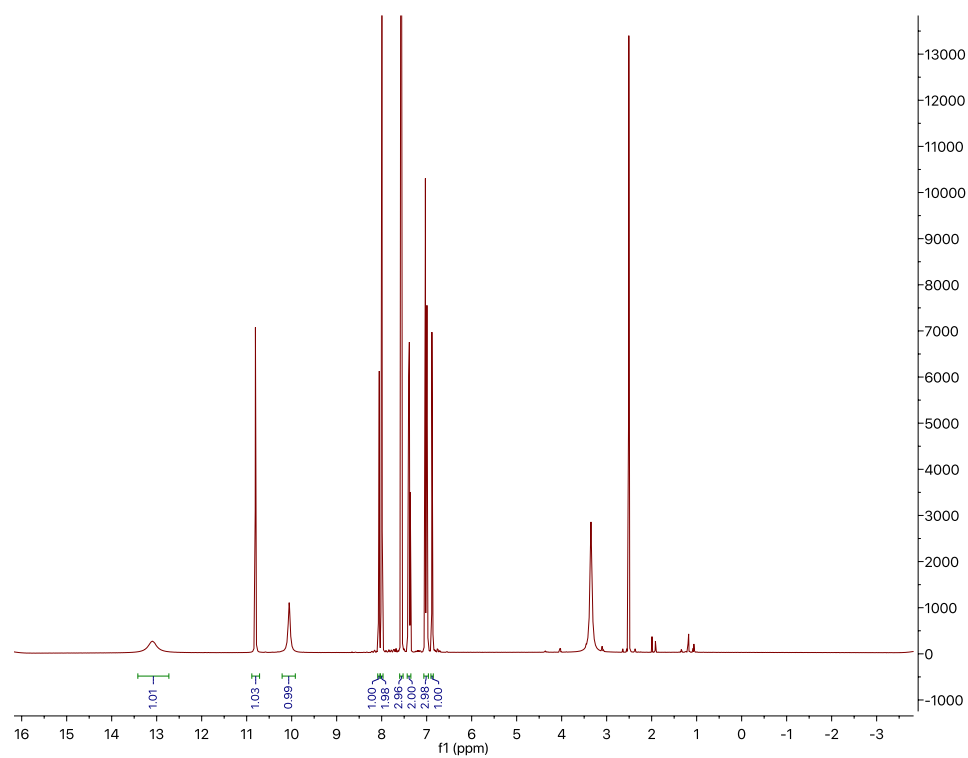

<sup>1</sup>H NMR spectrum of 1 (400 MHz, DMSO-*d*<sub>6</sub>)

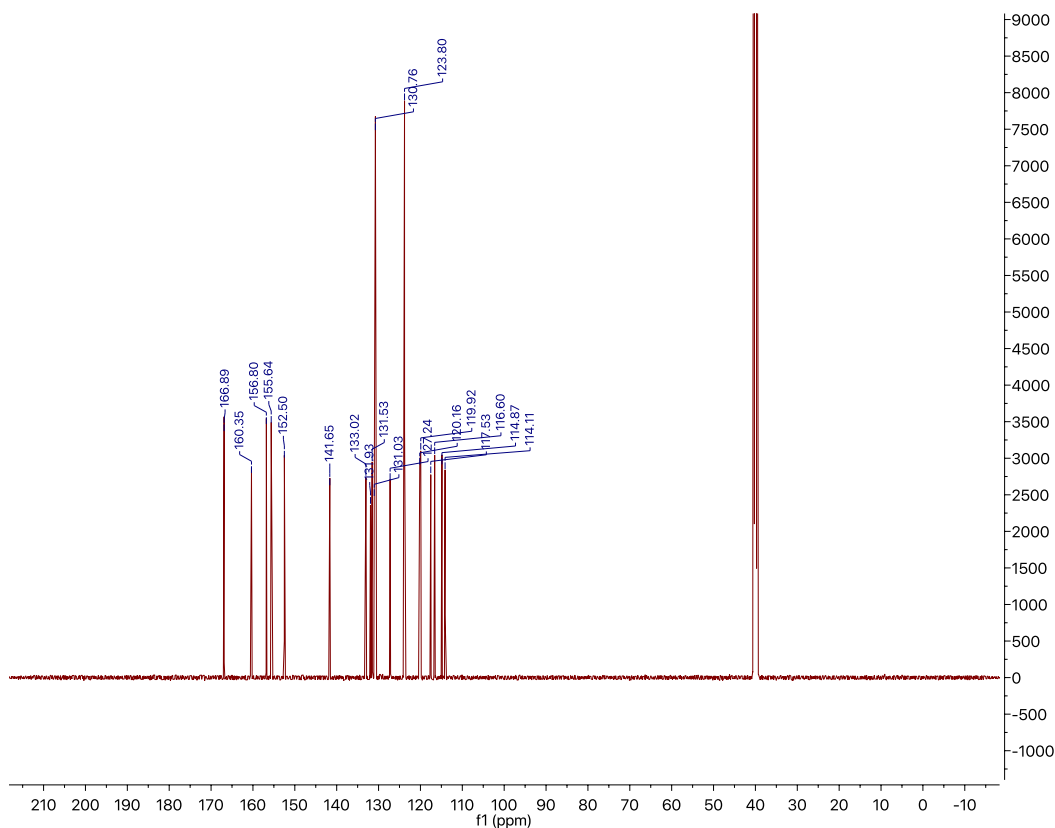

$^{13}\text{C}$  NMR spectrum of **1** (100.6 MHz,  $\text{DMSO}-d_6$ )

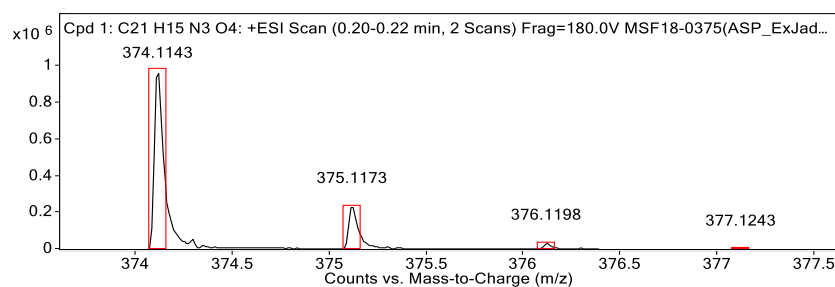

| Obs. m/z | Calc. m/z | Charge | Abundance | Formula                                                       | Ion Species        | Tgt Mass Error (ppm) |
|----------|-----------|--------|-----------|---------------------------------------------------------------|--------------------|----------------------|
| 374.1143 | 374.1135  | 1      | 983483    | C <sub>21</sub> H <sub>15</sub> N <sub>3</sub> O <sub>4</sub> | (M+H) <sup>+</sup> | -2.06                |
| 375.1173 | 375.1166  | 1      | 236734    | C <sub>21</sub> H <sub>15</sub> N <sub>3</sub> O <sub>4</sub> | (M+H) <sup>+</sup> | -1.68                |
| 376.1198 | 376.1193  | 1      | 36037     | C <sub>21</sub> H <sub>15</sub> N <sub>3</sub> O <sub>4</sub> | (M+H) <sup>+</sup> | -1.28                |
| 377.1243 | 377.1218  | 1      | 3565      | C <sub>21</sub> H <sub>15</sub> N <sub>3</sub> O <sub>4</sub> | (M+H) <sup>+</sup> | -6.62                |
| 378.0973 | 378.1244  | 1      | 720       | C <sub>21</sub> H <sub>15</sub> N <sub>3</sub> O <sub>4</sub> | (M+H) <sup>+</sup> | 71.53                |

--- End Of Report ---

HRMS (ESI) analysis of **1**

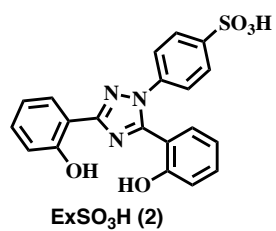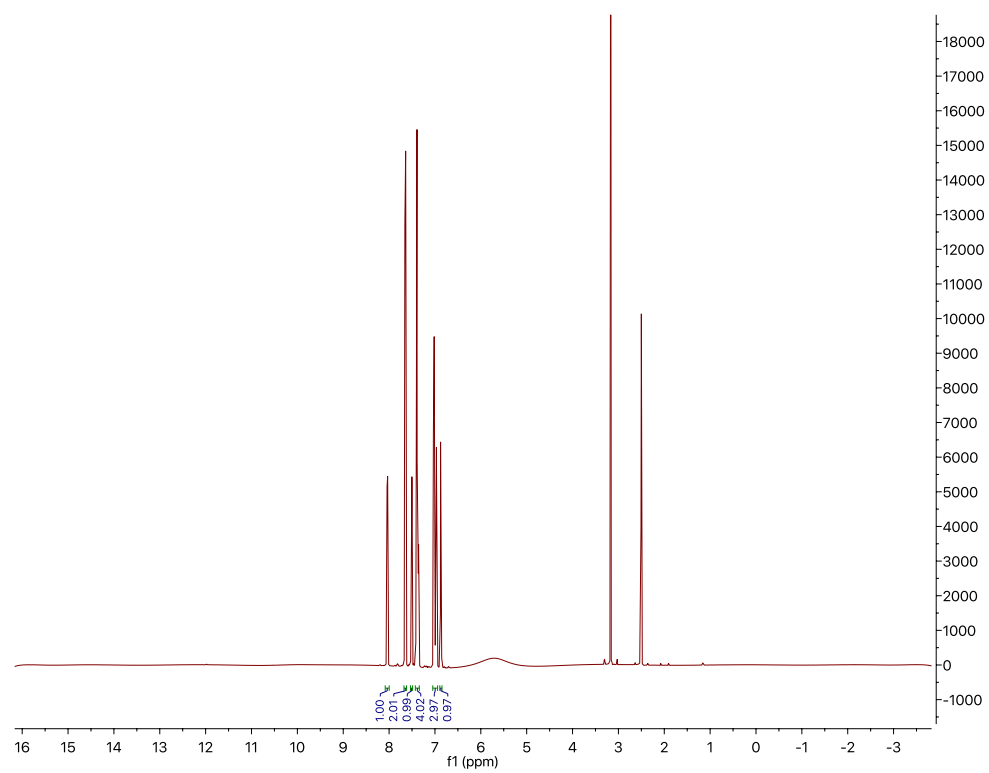

<sup>1</sup>H NMR spectrum of **2** (400 MHz, DMSO-*d*<sub>6</sub>)

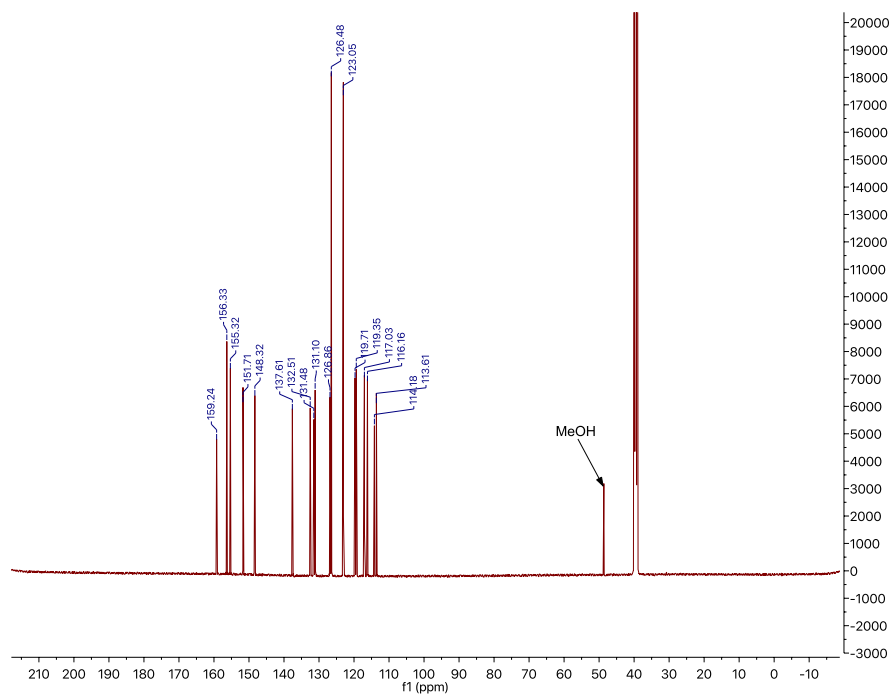

$^{13}\text{C}$  NMR spectrum of **2** (100.6 MHz,  $\text{DMSO}-d_6$ )

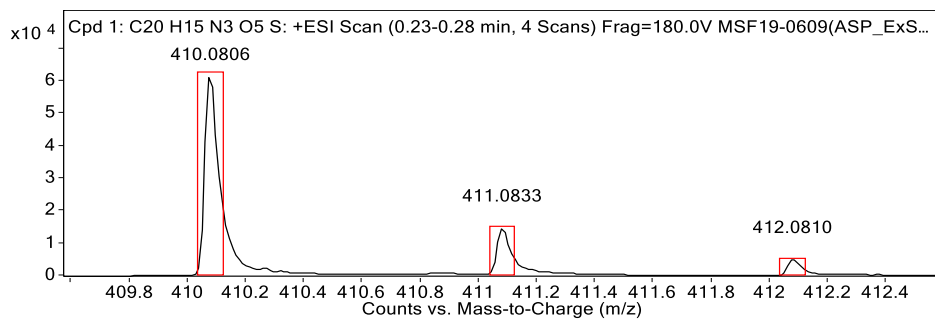

MS Spectrum Peak List

| Obs. m/z | Calc. m/z | Charge | Abundance | Formula                                                  | Ion Species        | Tgt Mass Error (ppm) |
|----------|-----------|--------|-----------|----------------------------------------------------------|--------------------|----------------------|
| 410.0806 | 410.0805  | 1      | 62694     | $\text{C}_{20}\text{H}_{15}\text{N}_3\text{O}_5\text{S}$ | (M+H) <sup>+</sup> | -0.31                |
| 411.0833 | 411.0835  | 1      | 14926     | $\text{C}_{20}\text{H}_{15}\text{N}_3\text{O}_5\text{S}$ | (M+H) <sup>+</sup> | 0.56                 |
| 412.0810 | 412.0807  | 1      | 5211      | $\text{C}_{20}\text{H}_{15}\text{N}_3\text{O}_5\text{S}$ | (M+H) <sup>+</sup> | -0.64                |
| 413.0838 | 413.0821  | 1      | 965       | $\text{C}_{20}\text{H}_{15}\text{N}_3\text{O}_5\text{S}$ | (M+H) <sup>+</sup> | -3.99                |
| 922.0098 |           |        | 332012    |                                                          |                    |                      |

--- End Of Report ---

HRMS (ESI) analysis of **2**

### 3. UV-Vis and Fluorescence Spectroscopic Experiments

Stock solutions of 5 mM **1**, **2** and  $\text{FeCl}_3 \cdot 6 \text{H}_2\text{O}$ , respectively, were prepared in dimethyl sulfoxide (DMSO) and used for all spectroscopic experiments unless otherwise indicated.

5 mM stock solutions in deionized water were prepared for the following metal salts and used to screen the putative interactions with various divalent and trivalent metal cations, namely  $\text{FeSO}_4 \cdot 7 \text{H}_2\text{O}$ ,  $\text{CuSO}_4 \cdot 5 \text{H}_2\text{O}$ ,  $\text{ZnSO}_4 \cdot 7 \text{H}_2\text{O}$ ,  $\text{MnSO}_4 \cdot \text{H}_2\text{O}$ ,  $\text{MgSO}_4 \cdot 7 \text{H}_2\text{O}$ ,  $\text{CaCl}_2$ ,  $\text{AlCl}_3$ ,  $\text{Cr}(\text{NO}_3)_3 \cdot 9 \text{H}_2\text{O}$ .

pH 2-5 buffers were made from 0.1 M aqueous AcOH/AcONa that was adjusted to the desired pH using appropriate amounts of 0.01 M NaOH and 0.01 M HCl, respectively.

For each fluorescence experiment, a 1 mM stock solution of HSA was freshly prepared in deionized water.

The effect of DMSO on the fluorescence emission was investigated by adding DMSO into deionized water containing 20  $\mu\text{M}$  HSA and 10  $\mu\text{M}$  **2**. The results are shown in Figure S1. Throughout all experiments conducted over the course of this investigation, the amount of DMSO in water never exceeded 2.5V%. Based on these results, the fluorescence quenching effect that may arise through the addition of DMSO from the stock solutions was considered small as compared to the quenching effect of added  $\text{Fe}^{3+}$ .

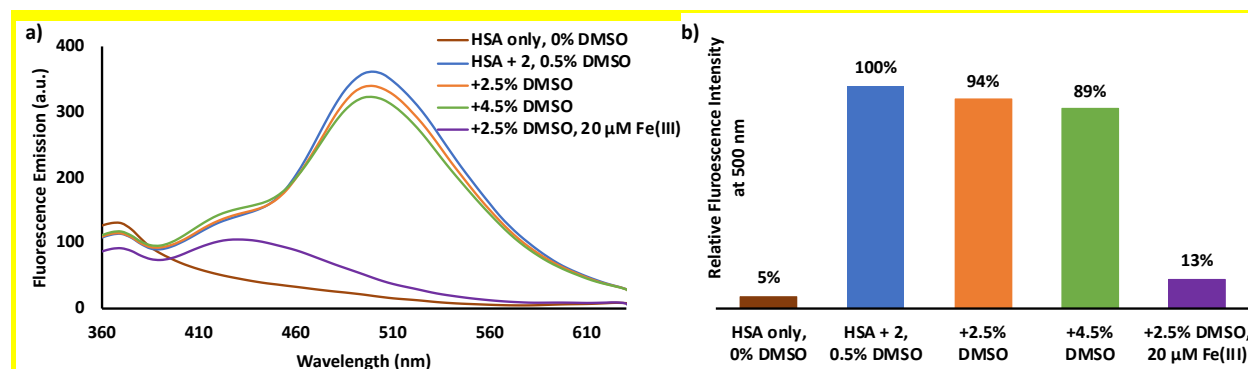

**Figure S1.** a) Emission profiles of 20  $\mu\text{M}$  HSA and 10  $\mu\text{M}$  **2** in deionized water before and after addition of DMSO. The emission profiles of HSA without **2**, as well as in the presence of 10  $\mu\text{M}$  **2** and 20  $\mu\text{M}$   $\text{Fe}^{3+}$ , are included as reference. All experiments were conducted with excitation at 330 nm and with excitation and emission slit widths of 5 nm, respectively. b) Bar chart showing the relative fluorescence intensities of selected samples at 500 nm.

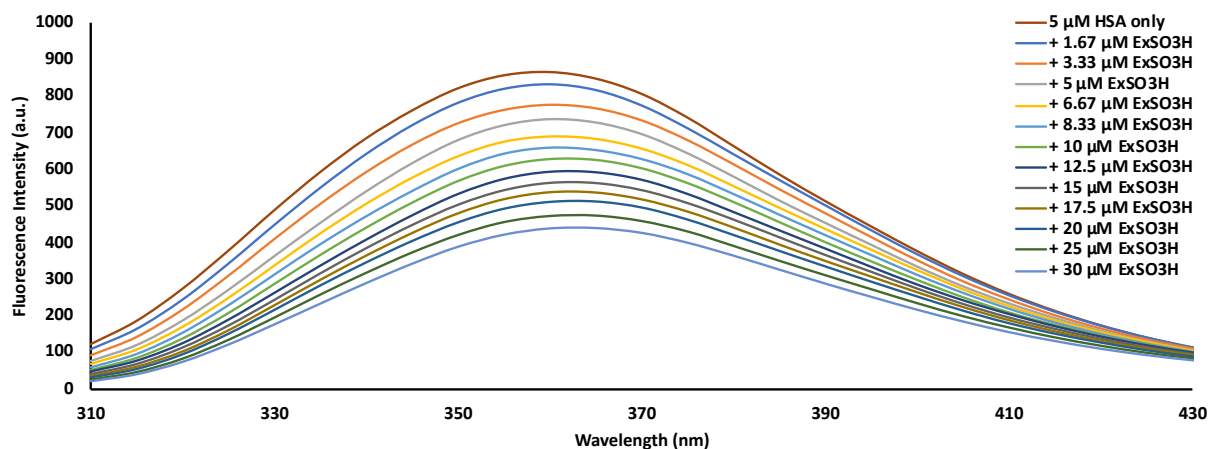

**Figure S2.** Emission profiles of 5  $\mu\text{M}$  HSA in deionized water titrated with **2**. Experiments were conducted with excitation at 290 nm. The excitation and emission slit widths were 5 nm, respectively. From the fluorescence intensity at 360 nm a Stern-Volmer plot and a corresponding double logarithm plot were constructed. The results are shown in Figure 7 in the main text.

## 4. Reference

- 1 S. Steinhauser, U. Heinz, M. Bartholomä, T. Weyhermüller, H. Nick and K. Hegetschweiler, *Eur. J. Inorg. Chem.*, 2004, **2004**, 4177–4192.
